# Supplementary material for: Whole Genome Sequencing of the Entomopathogenic Fungus Fusarium solani KMZW-1 and Its Efficacy Against Bactrocera dorsalis
Source: Preprints.org preprint supplement (doi:10.20944/preprints202409.1919.v1), 2024-09-24
Supplement: Supplementary file 1 [file supplementary]

## Sheet: Female Adult
Group	1D	2D	3D	4D	5D	6D	7D	8D	9D	10D	11D	12D
CK-1	1	2	2	2	3	3	3	3	3	4	4	4
CK-2	1	1	1	2	2	2	2	3	3	3	4	4
CK-3	1	1	2	2	3	3	3	3	4	4	4	5
104-1	2	2	2	6	6	7	7	8	8	9	9	10
104-2	1	2	4	5	5	7	7	7	9	10	10	11
104-3	1	3	3	4	4	4	6	6	8	8	9	10
105-1	1	3	3	7	7	7	9	9	10	11	13	13
105-2	2	3	3	6	6	7	8	10	11	11	12	13
105-3	2	2	2	4	7	9	10	12	12	13	13	14
106-1	1	3	5	5	5	6	9	10	11	13	15	16
106-2	1	4	5	5	7	6	9	10	12	14	16	16
106-3	1	2	2	2	3	7	8	9	13	14	15	15
107-1	3	3	4	4	5	8	8	13	15	15	16	17
107-2	2	3	6	5	5	6	9	11	14	14	16	17
107-3	3	4	4	6	6	10	11	12	15	17	17	17
108-1	2	3	3	5	6	7	11	13	13	15	16	18
108-2	2	3	5	6	7	8	10	11	15	16	17	18
108-3	1	3	4	4	6	10	12	14	16	16	17	17
109-1	2	3	3	3	4	6	14	15	16	16	18	20
109-2	1	3	3	5	4	7	13	14	18	19	19	20
109-3	1	2	2	3	10	14	10	16	18	18	18	19
1010-1	2	2	4	5	6	6	13	14	18	18	21	21
1010-2	2	3	4	5	5	6	11	15	15	17	20	20
1010-3	3	4	4	4	7	8	12	16	18	19	20	20
1011-1	3	4	6	6	8	12	15	17	19	19	20	20
1011-2	3	3	4	5	6	13	13	15	18	20	20	20
1011-3	2	4	5	6	6	12	13	19	20	20	21	21

## Sheet: Male Adult
Group	1D	2D	3D	4D	5D	6D	7D	8D	9D	10D	11D	12D
CK-1	1	1	3	4	4	4	4	5	6	6	6	6
CK-2	0	2	3	3	4	5	5	6	6	6	6	6
CK-3	0	2	4	4	4	4	6	6	5	6	6	6
104-1	1	1	2	2	3	5	7	9	11	12	13	13
104-2	1	3	3	3	6	6	10	10	12	14	14	14
104-3	0	2	2	5	4	7	9	11	11	11	13	15
105-1	1	2	5	7	8	8	13	14	13	14	15	16
105-2	1	3	5	7	10	12	12	13	16	16	16	16
105-3	2	4	7	6	12	12	12	12	13	15	15	16
106-1	2	4	5	8	9	10	13	13	16	17	17	18
106-2	1	4	5	7	9	10	12	14	14	16	17	17
106-3	3	5	4	6	12	12	15	17	18	18	17	18
107-1	1	1	5	7	9	10	12	13	15	16	19	20
107-2	1	2	6	9	9	10	17	14	19	19	20	21
107-3	1	2	5	7	11	12	14	15	16	16	19	21
108-1	1	4	5	7	9	9	11	17	18	18	20	22
108-2	1	2	5	9	9	9	14	16	19	20	21	23
108-3	1	4	6	9	13	14	15	18	18	19	20	24
109-1	1	2	6	7	8	15	15	17	19	19	21	23
109-2	2	5	5	8	12	16	18	18	19	20	21	24
109-3	1	3	5	12	13	10	12	14	16	22	22	23
1010-1	2	5	7	8	11	16	17	19	21	21	21	22
1010-2	3	6	10	11	12	12	14	17	20	20	20	23
1010-3	2	8	9	12	15	15	15	15	17	18	22	23
1011-1	1	3	7	8	8	13	14	16	19	19	21	22
1011-2	2	4	5	5	12	13	13	15	17	20	20	23
1011-3	1	6	4	10	11	12	14	15	18	19	21	23
